# Supplementary material for: Mir-132/212 is required for maturation of binocular matching of orientation preference and depth perception
Source: PubMed Central journal article supplement (PMC5457514; doi:10.1038/ncomms15488), 2017-05-23
Supplement: ncomms15488-s1.pdf [file ncomms15488-s1.pdf]

1 **Supplementary Figure 1.**

2

**a**

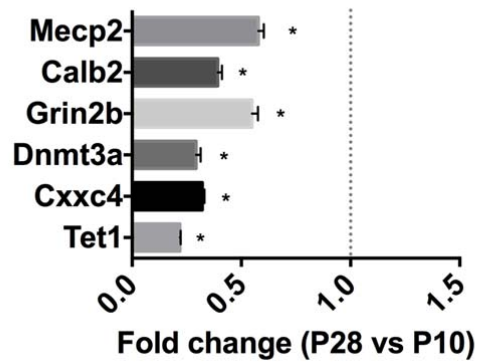

**b**

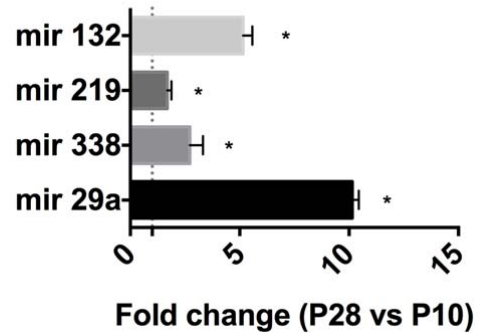

3

4 **Supplementary Fig. 1.** RT-PCR validation of RNAseq and small RNAseq data.  
5 mRNAs and miRNAs shown to be age regulated by RNA and small RNA sequencing  
6 showed the same regulation when assessed by RT-PCR. The data from P10 and  
7 P28 visual cortex samples were analyzed using the ddCT methods. **(A)** Fold change  
8 in P28 vs. P10 mice; Tet1, Cxyc4, Dnmt3a, Grin2b, Calb2, Mecp2 (t test,  $p < 0.0001$ ;  
9  $n = 4$  for each group and target). **(B)** Fold change in P28 vs. P10 mice for miR-29a,  
10 miR-338, miR-219, miR-132 (t test,  $p < 0.02$ ;  $n = 4$  for each group and target). Error  
11 bars represent SEM. Asterisks indicate statistical significance ( $p < 0.05$ ).

12

13

14

15

16 **Supplementary Figure 2.**

17

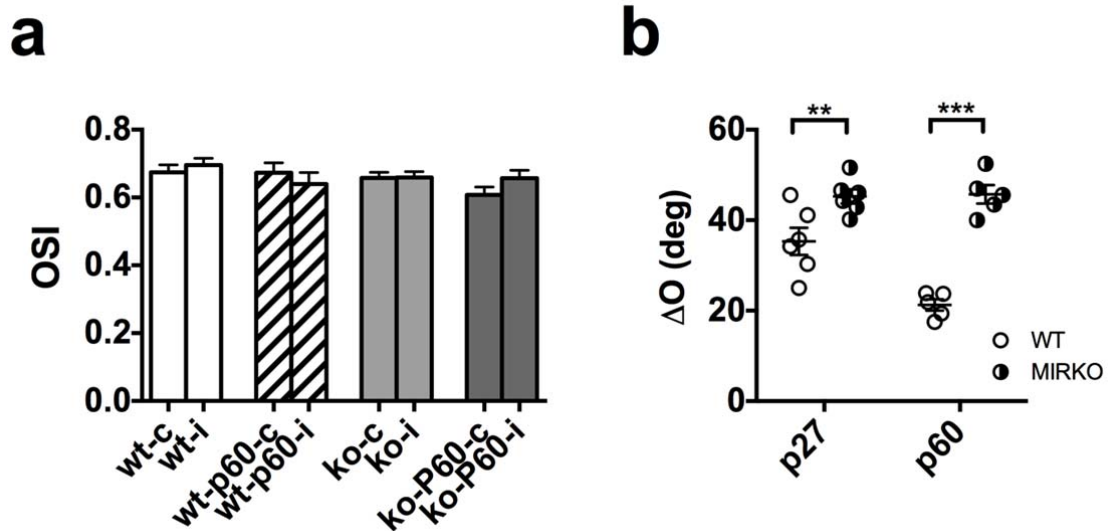

18

19 **Supplementary Fig 2. (A)** OSI in wt and mutant mice (ko) at P30 and P60 (wt-P60,  
20 ko-P60). Error bars represent SEM. **(B)**  $\Delta O$  values for wt, ko, wt-P60 and ko-P60  
21 animals. Results are analyzed by case. Whiskers represent the average  $\Delta O \pm$  SEM  
22 for each experimental group. Circles represent individual  $\Delta O$ s for each animal.  
23 Binocular matching is strongly impaired in miR-132/212 null mice both at P27-28 and  
24 P60 (Two-way ANOVA, effect of genotype  $p < 0.001$  ; post hoc Holm-Sidak test, wt  
25 vs. ko: P27-28  $p < 0.01$ , P60  $p < 0.001$ ). \*\*  $p < 0.01$ , \*\*\*  $p < 0.001$ .

26

27

28

29  
30  
31

**Supplementary Figure 3.**

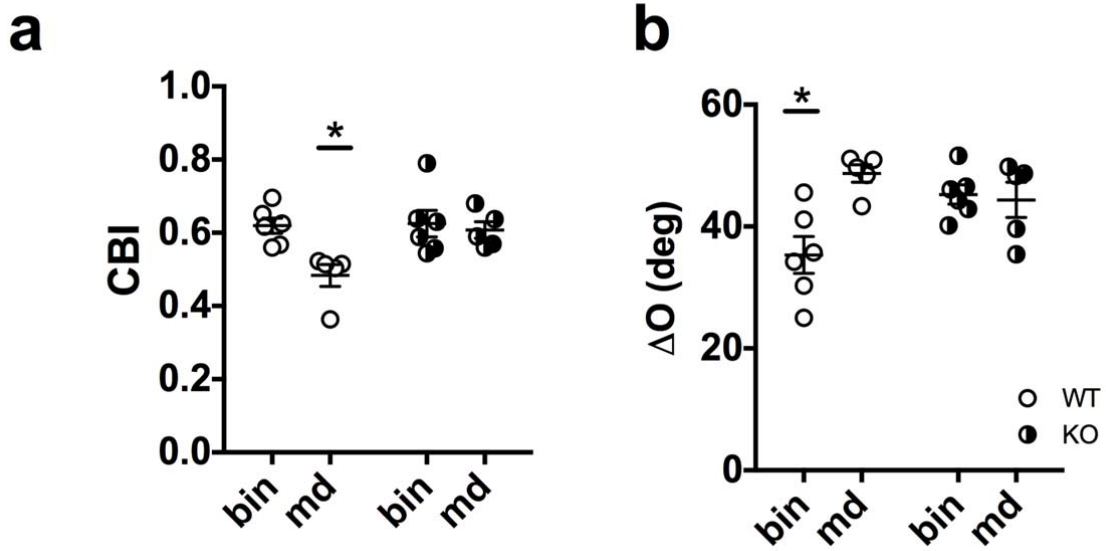

32  
33  
34  
35  
36  
37  
38  
39  
40  
41  
42  
43  
44  
45  
46  
47

**Supplementary Fig 3. (A)** Contralateral bias index (CBI) values for wt and ko mice monocularly deprived (md) or nondeprived (bin). Whiskers represent the average CBI ± SEM for each experimental group; circles represent individual CBIs for each animal. CBI of null mice was not significantly different from that of wt animals (Two-way ANOVA, genotype x condition interaction  $p < 0.05$ ; post-hoc Holm-Sidak test,  $p = 0.96$ ) and from that of md null mice (post-hoc Holm-Sidak test  $p = 0.97$ ), whereas md-wt mice displayed the typical ocular dominance (OD) shift towards the open eye (post-hoc Holm-Sidak test,  $p < 0.05$ ). **(B)**  $\Delta O$  values for wt, ko, wt-md and ko-md animals. Whiskers represent the average  $\Delta O \pm SEM$  for each experimental group; circles represent individual  $\Delta O$  for each animal. The effect of MD on binocular matching is occluded by the deletion of miR-132/212 (Two-way ANOVA, genotype x condition interaction  $p < 0.01$ ; post-hoc Holm-Sidak test: wt vs wt-md  $p < 0.01$ , ko vs. ko-md  $p = 0.795$ ). \*  $p < 0.05$ .

48

49 **Supplementary Figure 4.**

50

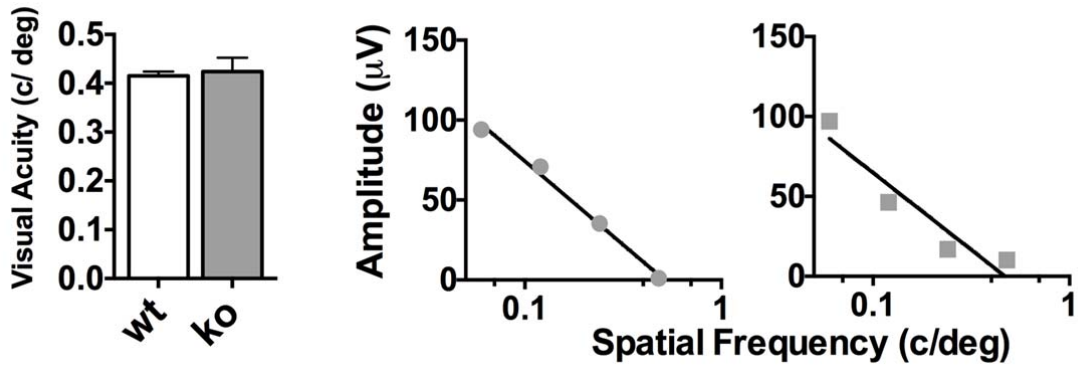

51

52

53 **Supplementary Fig. 4** *miR132/212* deletion does not affect visual acuity.

54 Histograms represent the average VA  $\pm$  SEM for wild-type (n = 3) and *miR132/212*

55 null mice (n = 3). Error bars represent SEM. Examples of VEP curves for single mice

56 are reported on the right.

57

58

59

60

61  
62  
63

**Supplementary Figure 5**

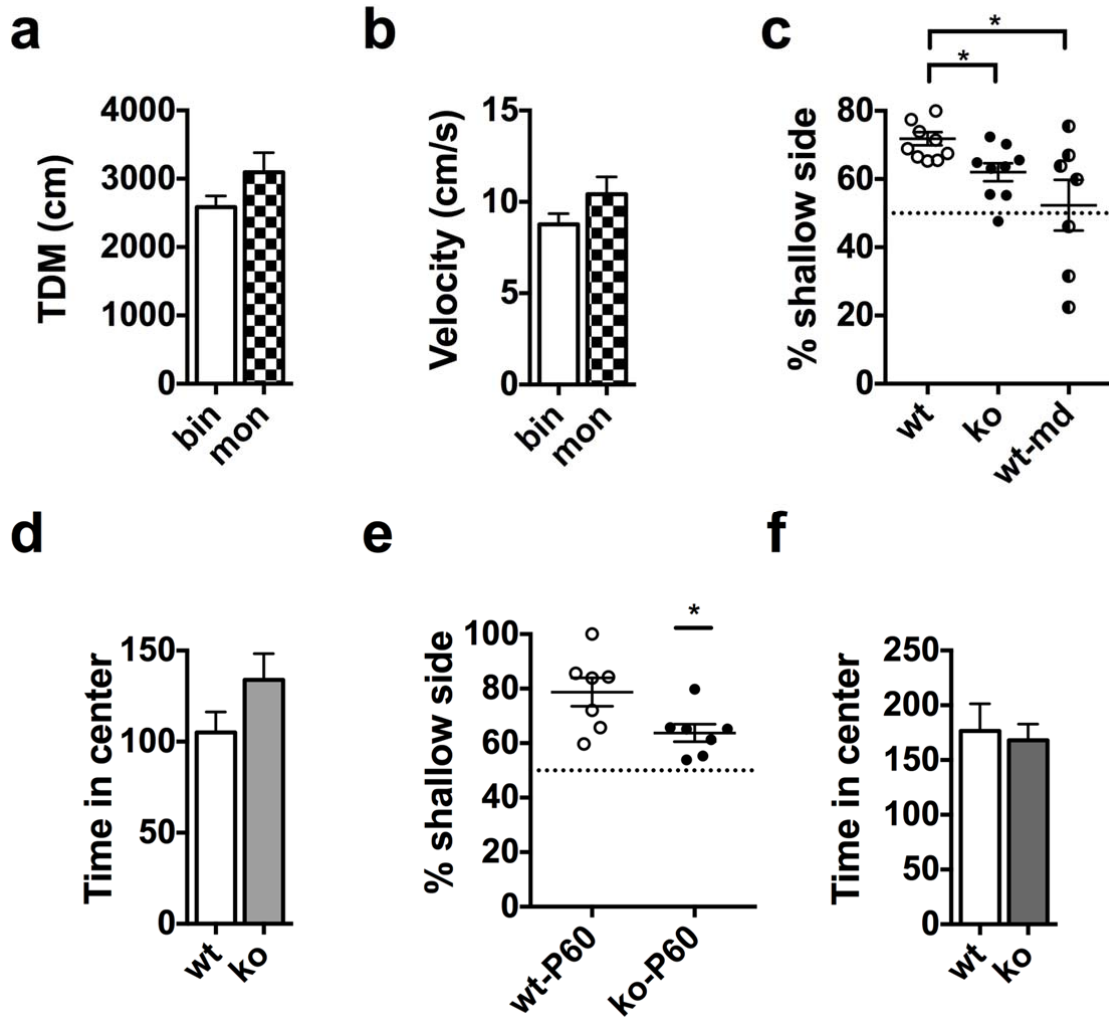

64  
65

66 **Supplementary Fig. 5. (A)** Total distance moved (TDM) and **(B)** velocity in bin and  
67 mon mice. **(C)** Average time spent in the shallow side for wt, ko and wt-md animals.  
68 Whiskers represent the average % in shallow side  $\pm$  SEM for each experimental  
69 group; circles represent individual percentages for each animal. Dotted line  
70 represents chance level. **(D)** No difference was detected between wt and ko animals  
71 in the time spent in the center of the visual cliff arena at P30 (t-test,  $p = 0.126$ ). **(E)**  
72 Average time spent in the shallow side for wt-P60 and ko P60 mice. Whiskers  
73 represent the average % in shallow side  $\pm$  SEM for each experimental group; circles  
74 report individual percentages for each animal. **(F)** Exploration time of the center of

75 visual cliff arena is totally comparable in wt-P60 and ko-P60 mice (t-test,  $p = 0.767$ ).  
76 \*  $p < 0.05$ .

77  
78  
79  
80  
81  
82  
83

**Supplementary Figure 6.**

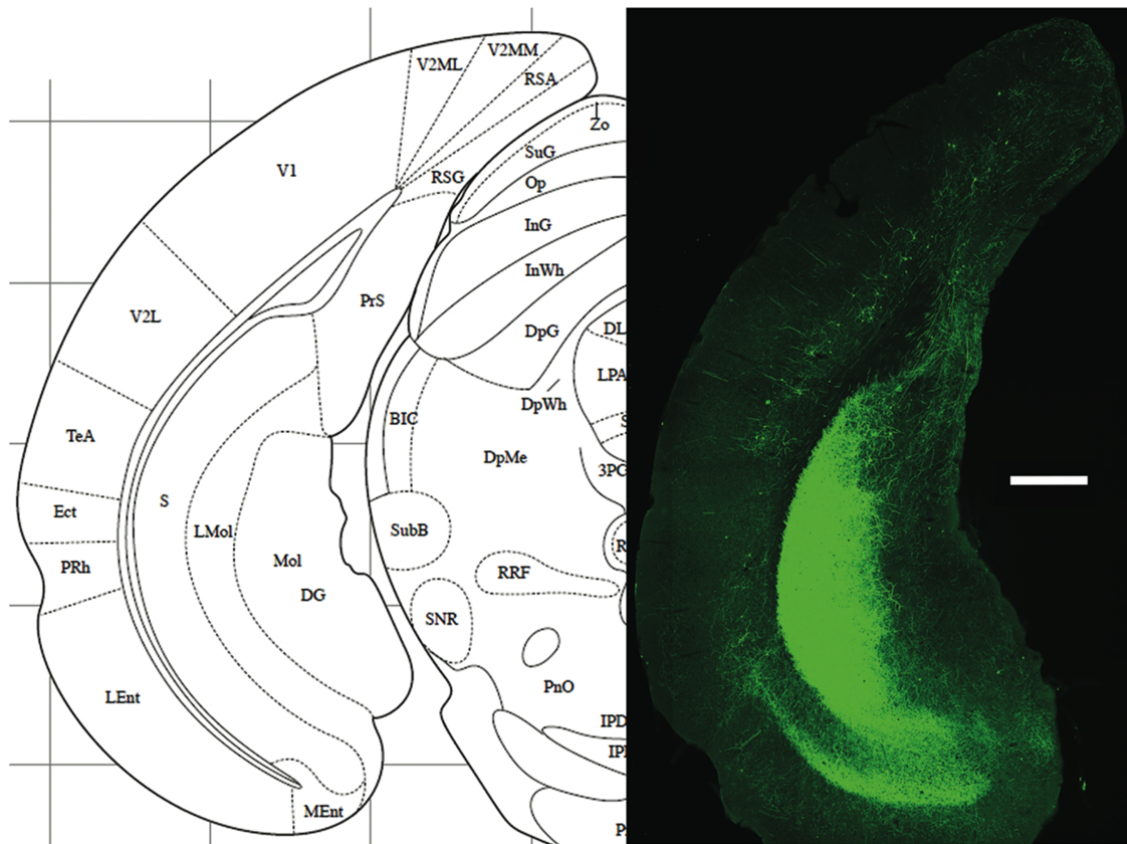

84  
85  
86  
87  
88  
89  
90  
91  
92  
93  
94

**Supplementary Fig. 6** Low magnification image of the visual cortex of a *miR132/212* mice crossed with GFP expressing line M mice. Please note GFP positive layer V pyramidal cell bodies and dendrites in the visual cortex. Left hand side: scheme with anatomical location of V1 (from Paxinos G and Franklin KBJ The mouse brain in stereotaxic coordinates 2nd edition 2001, Academic Press) Scale bar 500 microns



96

97 **Supplementary Figure 7.**

98

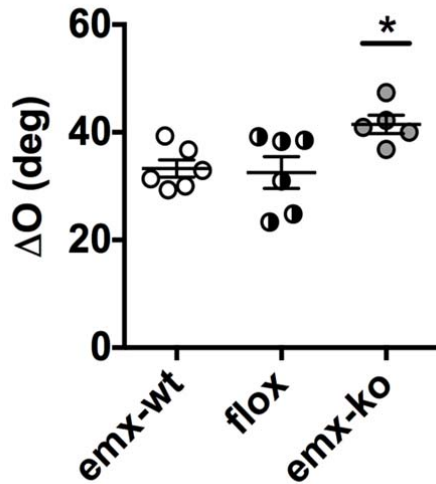

99

100

101 **Supplementary Fig. 7** ΔO values for emx-wt, flox, and emx-ko animals. Whiskers  
102 represent the average ΔO ± SEM for each experimental group; circles represent  
103 individual ΔOs for each animal. Binocular matching is significantly impaired in emx-  
104 ko mice (One-way ANOVA  $p < 0.05$ , post hoc Holm-Sidak test, miR-132/212<sup>fl/fl</sup> vs  
105 Emx1:Cre-miR-132/212<sup>-/-</sup>  $p < 0.05$ ; Emx1:Cre-wt vs Emx1:Cre-miR-132/212<sup>-/-</sup>  $p <$   
106  $0.05$ ; Emx1:Cre-wt vs miR-132/212<sup>fl/fl</sup>  $p = 0.808$ ) \*  $p < 0.05$ .

107

108
